# Supplementary material
Source: ML conference proceedings conference paper supplement (https://proceedings.neurips.cc/paper_files/paper/2023/hash/efe36e55d80a94d1726f660b8d237a0f-Abstract.html)
Supplement: Supplementary file 1 [file efe36e55d80a94d1726f660b8d237a0f-Supplemental-Conference.pdf]

---

# GLOBER: Coherent Non-autoregressive Video Generation via Global Guided Video Decoder

---

Anonymous Author(s)

Affiliation

Address

email

## 1 A Appendix

### 2 A.1 Broader Impact

3 The goal of this work is to advance research on video generation methods. Our method has the  
4 potential to facilitate the workflow of film production and animation, thereby exhibiting a positive  
5 influence on creative video applications. Since our method is trained mainly on domain-specific  
6 datasets, the potential deleterious consequences of exploiting our model for malicious purposes, such  
7 as spreading misinformation or producing fake videos, seem to be insignificant. Nevertheless, it  
8 remains crucial to apply an abundance of caution and implement strict and secure regulations.

### 9 A.2 Experimental Results on Long Video Generation Tasks

10 We obtain new state-of-the-art results on the SkyTimelapse and UCF-101 datasets for long video  
11 generation tasks. All experiments are conducted without conditional inputs. The quantitative results  
12 are reported in Table 1. MoCoGAN, MoCoGAN-HD, DIGAN, and StyleGAN-V are GAN-based  
13 methods, which dominate the field of vision generation until 2022. Based on diffusion probabilistic  
14 models, VIDM outperforms these GAN-based methods by a large margin. However, VIDM employs  
15 the auto-regression generation strategy to generate long videos, which lacks global guidance and  
16 suffers from error accumulation. Our method, GLOBER, outperforms VIDM significantly due to its  
17 incorporation of global features and non-autoregression generation strategy. We present several video  
18 samples in Fig. 1, which demonstrate that our method can generate long videos of remarkable quality.

Table 1: Quantitative Results of FVD comparison on the SkyTimelapse and UCF-101 datasets for 128-frame long video generation.

| Method              | UCF-101       | Sky Time-lapse |
|---------------------|---------------|----------------|
| MoCoGAN [CVPR18]    | 3679.0        | 575.9          |
| +StyleGAN2 backbone | 2311.3        | 272.8          |
| MoCoGAN-HD [ICLR21] | 2606.5        | 878.1          |
| DIGAN [ICLR22]      | 2293.7        | 196.7          |
| StyleGAN-V [CVPR22] | 1773.4        | 197.0          |
| VIDM [AAAI23]       | 1531.9        | 140.9          |
| GLOBER (ours)       | <b>1177.4</b> | <b>125.5</b>   |

### 19 A.3 More Qualitative Results

20 We present more qualitative results on the UCF-101, Sky Time-lapse, and TaiChi-HD datasets in the  
21 link: <https://anonymouss765.github.io/GLOBER>.

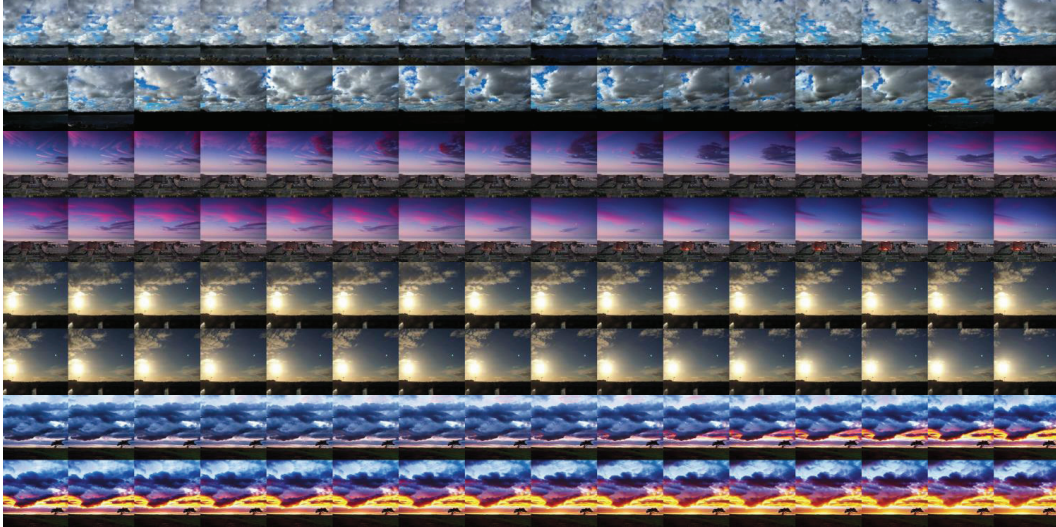

(a) Sky Time-lapse

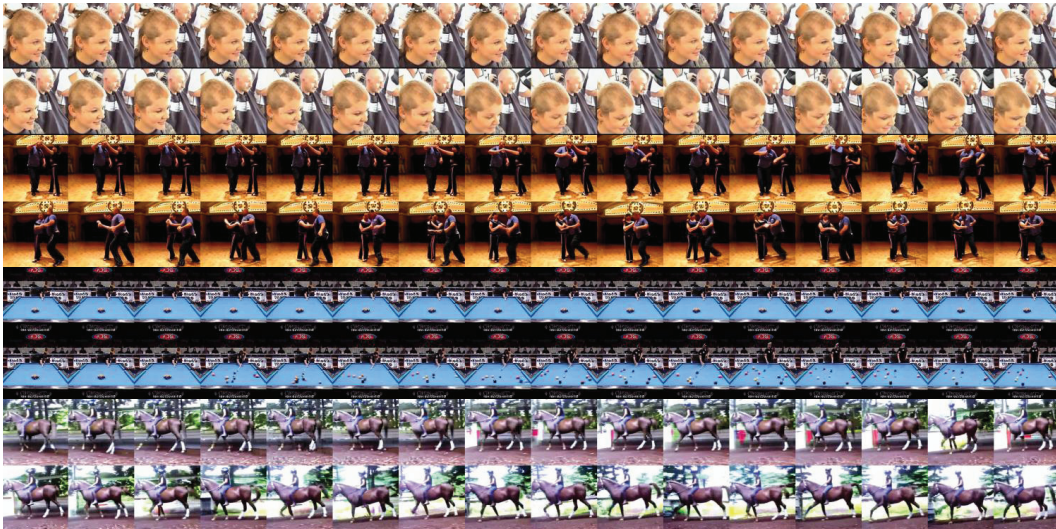

(b) UCF-101

Figure 1: Genetated long videos with 128 frames on the Sky Time-lapse and UCF-101 datasets (4 frames skipped).

#### 22 A.4 Sensitivity Analysis of Unconditional Guidance Scale

23 We investigate the effectiveness of the unconditional guidance scale  $\mu$  that is used when employing  
 24 class-condition constraints. Table 2 presents the influence of  $\mu$  on the FVD score of videos condition-  
 25 ally decoded by the video decoder on the UCF-101 256<sup>2</sup> benchmark. Table 3 presents the influence  
 26 of  $\mu$  on the FVD score of videos conditionally sampled by the video generator on the UCF-101 256<sup>2</sup>  
 27 dataset. It is evident that appropriate selection of the unconditional guidance scale is important in  
 28 ensuring the quality of videos decoded or sampled with class conditions.

Table 2: Sensitivity analysis of the unconditional guidance scale  $\mu$  for video reconstruction on the UCF-101 dataset.

| $\mu$ | 0     | 3     | 6            | 9     | 12    | 15    |
|-------|-------|-------|--------------|-------|-------|-------|
| FVD   | 211.4 | 114.3 | <b>106.7</b> | 133.2 | 281.1 | 670.8 |

Table 3: Sensitivity analysis of the unconditional guidance scale  $\mu$  for video generation on the UCF-101 dataset.

| $\mu$ | 0     | 3     | 6     | 9     | 12           | 15    |
|-------|-------|-------|-------|-------|--------------|-------|
| FVD   | 575.6 | 173.0 | 172.6 | 171.5 | <b>168.9</b> | 224.3 |

## 29 A.5 Settings of Hyper Parameters

The detailed settings of model hyper parameters are presented in Table 4.

Table 4: Hyper-parameters of the video auto-encoder and the quantitative results on video reconstruction. Experimental settings on the UCF-101 dataset are the same for both conditional and unconditional video generation except given video descriptions.

|                       | UCF-101 256 <sup>2</sup> | Sky Time-lapse 256 <sup>2</sup> | TaiChi-HD 128 <sup>2</sup> |
|-----------------------|--------------------------|---------------------------------|----------------------------|
| Batch Size            | 40                       | 32                              | 32                         |
| Learning Rate         | 1e-5                     | 1e-4                            | 5e-5                       |
| KL-VAE                |                          |                                 |                            |
| $f_{frame}$           | 8                        | 8                               | 4                          |
| Video Encoder         |                          |                                 |                            |
| $f_{video}$           |                          | 2                               |                            |
| Input Shape           |                          | 32                              |                            |
| Input Channels        |                          | 4                               |                            |
| Output Channels       |                          | 16                              |                            |
| Model Channels        |                          | 320                             |                            |
| Num Res. Blocks       |                          | 2                               |                            |
| Num Head Channels     |                          | 64                              |                            |
| Attention Resolutions |                          | [16, 8]                         |                            |
| Channel Multiplies    |                          | [1, 2]                          |                            |
| Video Decoder (UNet)  |                          |                                 |                            |
| Input Shape           |                          | 32                              |                            |
| Input Channels        |                          | 4                               |                            |
| Output Channels       |                          | 4                               |                            |
| Model Channels        |                          | 320                             |                            |
| Num Res. Blocks       |                          | 2                               |                            |
| Num Head              |                          | 8                               |                            |
| Attention Resolutions |                          | [32, 16, 8]                     |                            |
| Channel Multiplies    |                          | [1, 2, 4, 4]                    |                            |
| Video Generator (DiT) |                          |                                 |                            |
| Input Shape           | 16                       | 16                              | 16                         |
| Input Channels        | 16                       | 16                              | 16                         |
| Model Channels        | 1152                     | 1024                            | 1024                       |
| Num Head              | 16                       | 16                              | 16                         |
| Depth                 | 28                       | 20                              | 20                         |
| Mlp Ratio             | 4                        | 4                               | 4                          |

30
